# Supplementary material
Source: publisher figshare collection journal article supplement (https://gsapubs.figshare.com/ndownloader/files/23300837)
Supplement: Supplementary file 1 [file 23300837]

# Deep echinoderm phylogeny preserved in organic molecules from Paleozoic fossils

Christina E. O'Malley, William I. Ausich<sup>\*</sup>, and Yu-Ping Chin

<sup>\*</sup>Author to whom correspondence should be addressed, e-mail: [ausich.1@osu.edu](mailto:ausich.1@osu.edu)

## INTRODUCTION

The presence of fossilized organic molecules has been documented with various geochemical and imaging technology, which is both a strength and a perceived problem for this field. First, the fact that detection of taxon-specific organic molecules is, in general, technique independent is a strength. Alternatively, varying techniques between labs has raised questions (Wolkenstein, 2014; O'Malley, 2014), which needlessly add doubt to the basic result of the relatively common existence of fossilized organic molecules in echinoderms. Extracts are the geologically stable products of original organic molecules in most, if not all, instances. This raises new, interesting questions and is a fruitful area of future research, but it does not detract from the fact that taxon-specific organic molecules can be extracted directly from individual Mesozoic and Paleozoic fossils. The present paper is a contribution building on previous research of preserved organic molecules in Paleozoic echinoderms.

## ECHINODERM MORPHOLOGICAL DISPARITY

Because of their multi-plated, mesodermal skeletons, the morphological disparity of echinoderms is very high. Symmetries include bilateral, pentaradial, radial, helically twisted, and irregular. Adult body size varies from less than 2 mm to crinoids with stems in excess of 20 m in height (Hess et al., 1999). Skeletons vary from firmly cemented plates to flexible plating to the absence of plating. Consequently, much effort has been expended to document and understand morphological disparity both among echinoderm classes and within echinoderm clades (Foote, 1992, 1994; Sumrall and Wray, 2007; Villier and Eble, 2004; Lefebvre et al., 2006; Deline and Ausich, 2011; Zamora et al., 2012; Deline, 2015). Morphological disparity between clades may be sufficiently high that virtually no discrete homologous characters can be identified other than synapomorphies for the Echinodermata as a whole (e.g., compare helicoplacoids to blastoids). This lack of discrete characters was also critical for comparing crinoids, blastozoans, and other pentaradial echinoderms until the work of Sumrall and Waters (2012) and Kammer et al. (2013). Disparity of this magnitude leaves little information for an objective basis for phylogeny.

## FOSSIL ORGANIC MOLECULES

A substantial body of knowledge has been amassed to understand organic molecules preserved in sedimentary rocks. Preserved molecules have been an essential component of understanding the evolution of Proterozoic life (e.g., Summons and Walter, 1990; Brocks et al., 1999; Knoll, 2003; Gaines et al., 2009; Love et al., 2009) and have been essential for fingerprinting hydrocarbons (e.g., Tissat et al., 1978; Barakat et al., 2002). These studies have principally relied on isolated molecules from whole rock samples, which contrast with the present study that has isolated organic molecules directly from the fossil skeletons. In the former,

better-studied field, the structure of molecules is used, among other things, to infer the potential host organism or to characterize specific petroleum deposits. In contrast, the extractions of this study reveal the molecules still preserved within a fossil. Besides the work on fossil echinoderms, relatively few studies have extracted organic fossils directly from fossil. One example is Taylor et al. (2006), who extracted organic molecules from fossil plates. They identified oleanane from Cretaceous Bennettitales and Permian Gigantopteridales.

The biogeochemical pathways to preserve organic molecules in fossil echinoderms are, as yet, not fully understood. However, the fact that an original biological signal is preserved is demonstrated by the presence of fossil occurrences with different species of crinoids preserved in different colors (Bather, 1892; Laudon and Beane, 1937; Blumer, 1965; Lane, 1973; Wolkenstein, 2005; Wolkenstein et al., 2008; O'Malley, 2005, 2013).

## **LIVING ECHINODERM BIOMOLECULES**

Echinoderms are the only animal phylum to produce anthraquinones and naphthoquinones (Stonik and Elyakov, 1988). At least 53 different naphthoquinones, anthraquinones, bianthrone, naphthopyrones, and complex related quinones have been identified in living echinoderms (e.g., Fox and Vevers, 1960; Fox, 1976; Gough and Sutherland, 1970; Kent et al., 1970; Francesconi, 1980; Rideout and Sutherland, 1981, 1985; Stonik and Elyakov, 1988; DeRiccardis et al., 1991; Takahashi et al., 2002). Some of these molecules are thought to function as defensive ingestion deterrents in modern echinoderms, i.e., it causes them to taste bad to potential predators.

In pioneering studies, Blumer (1951, 1960, 1962a, 1962b, 1965), Blumer and Omenn (1961), and Thomas and Blumer (1964) extracted polycyclic aromatic quinones (PAQ)

(fringelites) from Jurassic crinoids. Subsequently, various PAQs have been extracted from Triassic and Jurassic crinoids, and fringelites are now recognized as fossil hypericinoids (Wolkenstein et al., 2006, 2008; Wolkenstein, 2014). O'Malley et al. (2005, 2008, 2013) extracted organic molecules from Mississippian crinoids. Extracts were a mixture of organic molecules and were characterized using various techniques. Although the exact identity of individual molecules remains unknown in these mixtures, the extracts were compared with chemical standards that suggested that diagenetically altered quinone-like molecules were present. Regardless of the identity of each molecule in extract mixtures, O'Malley (2013) successfully used fluorescence excitation-emission spectroscopy (EEM) spectra to elucidate phylogenetic relationships among these fossil crinoids. Fluorescence spectroscopy is a non-destructive (with respect to the extracts), fast, and convenient approach to “fingerprint” the fluorophoric signature of extracts.

## **METHODS**

Extraction of organic molecules was accomplished by placing finely ground solid sample into a glass fiber thimble within a Soxhlet apparatus, and methanol was continuously refluxed through the sample through dissolving echinoderm plates in hydrochloric acid and Soxhlet extraction. Extracts were concentrated into a pellet with a centrifuge. The solid pellet was further extracted in a 4:1 vol./vol. solution of acetone:methanol, decanted, and extracted again in methanol.

Fossil echinoderm extracts are water soluble and were subjected to various analytical measurements. In O'Malley et al. (2013) a combination of the Fluorescence Excitation Emission

Matrix Spectroscopy (EEM) and ESI-tandem mass spectroscopy were used. In contrast, here we demonstrate that robust data are derived using only EEM, which is relatively less expensive and less labor. Further, we demonstrate the potential of using EEMs for addressing paleobiological problems.

EEM results are presented here. EEMs are an effective method to measure fluorescing compounds, such as PAQ. EEMs are collected by measuring emission scans with increasing excitation wavelengths, resulting in a contour plot that is highly detailed and can be used to distinguish and identify fluorescent compounds in complex mixtures (Christian et al., 1981; Lochmuller and Saavedra, 1998; Leiner and Wolfbeis, 1988; Coble, 1996; Stedmon et al., 2003; Cory and McKnight, 2005). The peaks in an EEM plot represent compound(s) with similar fluorescent properties and provide information on types of fluorophores present. EEM plots were generated using the MatLab code written by Rose Cory (Cory et al., 2005, 2010; Stedmon and Bro, 2008).

Fluorescence spectroscopy was conducted on a Varian Cary Eclipse. EEMs analyses were performed on samples such that absorbance at 254 nm was less than 0.05 (Lackowicz, 2006) and scanned with excitation wavelengths ( $\lambda_{\text{ex}}$ ) = 240-450 nm (5 nm increments). Emission wavelengths ( $\lambda_{\text{em}}$ ) were recorded in 2 nm increments between 300-600 nm. All EEMs were blank subtracted, corrected using correction files specific to the instrument, and normalized to Raman areas of DI water using a  $\lambda_{\text{ex}}$ =350 nm.

With Mississippian crinoids, O'Malley et al. (2008, 2013) demonstrated that the same organic molecules were consistently extracted from different positions (e.g., calyx and stem) along a single crinoid individual, and the extracts from fossil echinoderm specimens were different than extracts from the enclosing rocks. Because analyses of multiple specimens and

multiple parts of the anatomy of a specimen yielded the same results for Mississippian crinoids (O'Malley, et al., 2013), single specimens were evaluated in this study. Specimens are deposited in the Orton Geological Museum, The Ohio State University, as indicated in Table DR1.

**Table DR1. Names, stratigraphy, locations, and specimen numbers for echinoderms from which organic molecules were extracted for the present analysis.**

| <b>Class</b> | <b>Taxon</b>                                                | <b>Geologic Period</b>                                                                                                                 | <b>Location</b>                                                                                                     |
|--------------|-------------------------------------------------------------|----------------------------------------------------------------------------------------------------------------------------------------|---------------------------------------------------------------------------------------------------------------------|
| Asteroidea   | <i>Stenaster</i> sp.<br>OSU 54434                           | Bobcaygen Fm.;<br>Ordovician                                                                                                           | Kirkfield, Ontario                                                                                                  |
| Blastoidea   | <i>Pentremites</i> sp.<br>OSU 54435                         | Indian Springs Shale, Sulphur, Indiana;<br>Mbr., Big Clifty Fm.; NE $\frac{1}{4}$ NE $\frac{1}{4}$ SW $\frac{1}{4}$ ,<br>Mississippian | sec. 24. T3S, R1W                                                                                                   |
| Crinoidea    | <i>Elegantocrinus</i><br><i>hemisphaericus</i><br>OSU 54436 | Edwardsville Fm.;<br>Mississippian                                                                                                     | Boy Scout Camp,<br>Monroe Co, Indiana;<br>SW $\frac{1}{4}$ SE $\frac{1}{4}$ SW $\frac{1}{4}$ ,<br>sec., 8, T7N, R1E |

|                 |                         |                    |                    |
|-----------------|-------------------------|--------------------|--------------------|
| Diploporita     | <i>Holocystites</i> sp. | Massie Fm.;        | Napoleon, Indiana; |
|                 | OSU 54437               | Silurian           | N39° 12' 31.39",   |
|                 |                         |                    | W85° 18' 53.75"    |
| Echinoidea      | cidaroid                | unknown provenance |                    |
|                 | OSU 54438               |                    |                    |
| Edrioasteroidea | <i>Isorophus</i>        | Bellevue Fm.;      | Stonelick Creek,   |
|                 | <i>cincinnatiensis</i>  | Ordovician         | Cincinnati, Ohio;  |
|                 | OSU 54439               |                    | N39° 10' 23",      |
|                 |                         |                    | W84° 07' 35"       |

## REFERENCES CITED

- Barakat, A.O., Mostafa, A.R., Qian, Y., and Kennicutt, II, M.C., 2002, Application of petroleum hydrocarbon chemical fingerprinting in oil spill investigations – Gulf of Suez, Egypt: Spill Science and Technology Bulletin, v. 7, p. 229–239.
- Bather, F.A., 1892, The fossil Crinoidea in the British Museum: Annual Report of the Museum's Association for 1891, p. 78-110.
- Blumer, M., 1951, Fossile Kohlenwasserstoffe und Farbstoffe in Kalksteinen: Mikrochem, v. 36/37, p. 1048–1055.
- Blumer, M., 1960, Pigments of a fossil echinoderm: Nature, v. 188, p. 1100-1101.
- Blumer, M., 1962a, The organic chemistry of a fossil – I: The structure of fringelite-pigments. Geochimica et Cosmochemica Acta v. 26, p. 225-227.

- Blumer, M., 1962b, The organic chemistry of a fossil – II: Some rare polynuclear hydrocarbons. *Geochimica et Cosmochemica Acta* v. 26, p. 228-230.
- Blumer, M., 1965, Organic pigments: their long-term fate: *Science*, v. 149, p. 722–726.
- Blumer, M. and Omenn, G.S., 1961, Fossil porphyrins: uncomplexed chlorins in a Triassic sediment: *Geochimica et Cosmochemica Acta* v. 26, p. 81-90.
- Brocks, J.J., Logan, G.A., Buick, R., and Summons, R.E., 1999, Archean molecular fossils and the early rise of Eukaryotes: *Science*, v. 285, p. 1033-1036.
- Christian, G.D., Callis, J.B., and Davidson, E.R., 1981, Array detectors and excitation-emission matrices in multicomponent analysis, *in* Wehry, E.L., ed., *Modern Fluorescence Spectroscopy 4*: New York, NY, Plenum, p. 111–165.
- Coble, P.G., 1996, Characterization of marine and terrestrial DOM in seawater using excitation-emission matrix spectroscopy: *Marine Chemistry*, v. 51, p. 325–346.
- Cory, R. & McKnight, D.M., 2005, Fluorescence spectroscopy reveals ubiquitous presence of oxidized and reduced quinones in dissolved organic matter. *Environmental Science and Technology*, v. 9, p. 8142-8149.
- Cory, R., Miller, M.P., Guerard, J., McKnight, D.M. and Miller, P.L., 2010, Effect of instrument-specific response on the analysis of fulvic acid and fluorescence spectra: *Limnology and Oceanography Methods*, v. 8, p. 67-78.
- Deline, B., 2015, Quantifying morphological disparity in early Paleozoic echinoderms *in* Zamora, S., and Rábano, I., eds., *Progress in Echinoderm Paleobiology*, Publicaciones del Instituto Geológico y Minero de España, Cuadernos de Museo Geominero, n. 19, pp. 45-48.



- Deline, B., and Ausich, W.I., 2011, Testing the plateau: a reexamination of disparity and morphological constraints in early Paleozoic crinoids: *Paleobiology*, v. 37, p. 529-555.
- DeRiccardis, F., Iorizzi, M., Minale, L., Riccio, R., Richer de Forges, F.B., and Debitus, C., 1991, The Gymnochromes: Novel marine brominated phenanthroperylenequinone pigments from the stalked crinoid *Gymnocrinus richeri*: *Journal of Organic Chemistry*, v. 56, p. 6781–6787.
- Falk, H, Mayr, E., and Richter, A.E., 1994, Simple diffuse-reflectance UV-Vis Spectroscopic determination of organic pigments (fringelites) in fossils. *Microchimica. Acta*, v. 117, p. 1–5.
- Foote, M., 1992, Paleozoic record of morphological diversity in blastozoan echinoderms: *Proceedings of the National Academy of Sciences*, v. 89, p. 7325-7329.
- Foote, M., 1994, Morphological disparity in Ordovician-Devonian crinoids and the early saturation of morphological space: *Paleobiology*, v. 20, p. 320-344.
- Fox, D.L., 1976, *Animal Biochromes and Structural Colors*, Berkeley, California, University of California Press.
- Fox, H.M. and Vevers, G., 1960, *The nature of animal colours*. London, Sidgewick and Jackson Limited.
- Francesconi, K.A., 1980, Pigments of some echinoderms collected from western Australian waters. *Australian Journal of Chemistry*, v. 33, p. 2781-2784.
- Gaines, S.M., Eglinton, G., and Rullkötter, J., 2009, *Echoes of Life*: Oxford University Press, Oxford, UK, 355 p.

- Gough, J.H., and Sutherfield, M.D., 1970, Pigments of Marine Animals IX. A synthesis of – acetyl-2,3,5,7-tetrahydroxy-1,4-naphthoquinone: its status as an echinoderm pigment: Australian Journal of Chemistry, v. 23, p. 1839–1846.
- Hess, H., Ausich, W.I., Brett, C.E., and Simms, M.J., 1999, Fossil Crinoids: Cambridge University Press, Cambridge, UK., 275 p.
- Kammer, T.W., Sumrall, C.D., Zamora, S., Ausich, W.I., and Deline, B., 2013, Oral region homologies in Paleozoic crinoids and other plesiomorphic pentaradiate echinoderms: PLoS ONE, v. 8, 16 p., doi:10-1371/journal.pone.0077989.
- Kent R.A., Smith, L.R., and Sutherland, M.D., 1970, Pigments of marine animals X. substituted naphthopyrones from the crinoid *Comanteria perplexa*. Australian Journal of Chemistry, v. 23, p. 2325-2335.
- Knoll, A.H., 2003, Life on a Young Planet: Princeton University Press, Princeton, New Jersey, 299 p.
- Lane, N.G., 1973, Paleontology and paleoecology of the Crawfordsville fossil site (Upper Osagian, Indiana): University of California Publications in the Earth Sciences, v. 17, 141 p.
- Laudon, L.R., and Beane, B.H., 1937, The crinoid fauna of the Hampton Formation at LeGrand, Iowa: University of Iowa Studies, v. 17 p. 227-272.
- Leiner, M.J.P., and Wolfbeis, O.S., 1998, Biochemical application of 3-dimensional fluorescence spectrometry, in Lakowicz, J.R. ed., Time Resolved Laser Spectroscopy in Biochemistry. SPIE Proceedings v. 909, p. 134–138.
- Lakowicz, J.R., 2006, Principles of Fluorescence Spectroscopy. New York, Springer, 954 p.

- Lefebvre, B., Eble, G., Navarro, N., and David, B., 2006, Diversification of atypical Paleozoic echinoderms: a quantitative survey of stylophoran disparity, diversity, and geography: *Paleobiology*, v. 32, p. 483-510.
- Lochmuller, C.H., and Saavedra, S.S., 1998, Conformational changes in a soil fulvic acid measured by time-dependent fluorescence depolarization: *Analytical Chemistry*, v. 58, p. 1978–1981.
- Love, G.D., Grosjean, E., Stalvies, C., Fike, D.A., Grotzinger, J.P., Bradley, A.S., Kelly, A.E., Bhatia, M., Meredith, W., Snape, C.E., Bowring, S.A., Condon, D.J., and Summons, R.E., 2009, Fossil steroids record the appearance of Demospongiae during the Cryogenian period: *Nature*, v. 457, p. 718–721.
- O'Malley, C.E., Ausich, W.I., and Chin, Y.-P., 2005, Biomarkers in Paleozoic crinoids (Borden Group, Mississippian). Implications for phylogeny. *Geological Society of America Abstracts with Programs*, v. 37, p. 133.
- O'Malley, C.E., Ausich, W.I. & Chin, Y.-P., 2008, Crinoid biomarkers (Borden Group, Mississippian): Implications for phylogeny *in* Ausich, W.I., and Webster, G.D., eds. *Echinoderm Paleobiology*, Bloomington, Indiana, Indiana University Press, pp. 290-306.
- O'Malley, C.E., Ausich, W.I., and Chin, Y.-P., 2013, Isolation and characterization of the earliest taxon-specific organic molecules (Mississippian, Crinoidea): *Geology* v. 41, p. 347–350.
- O'Malley, C.E., Ausich, W.I., and Chin, Y.-P., 2014, Comment Reply: Isolation and characterization of the earliest taxon-specific organic molecules (Mississippian, Crinoidea): *Geology*, v. 42, p. e322. doi: 10.1130/G35388Y.1.

- Rideout, J.A. and Sutherland, M.D., 1981, Pigments of Marine Animals. XIV Polyketide sulfates from the crinoid *Comatula pectinata*. Australian Journal of Chemistry, v. 34, p. 2385-2392.
- Rideout, J.A. and Sutherland, M.D., 1985, Pigments of Marine Animals. XV Bianthrone and related polyketides from *Lamprometra palmate gyges* and other species of crinoids: Australian Journal of Chemistry, v. 34, p. 793–808.
- Stedmon, C. and Bro, R., 2008, Characterizing dissolved organic matter fluorescence with parallel factor analysis: a tutorial. Limnology and Oceanographic Methods, v. 6, p. 572–579.
- Stedmon, C.A., Markager, S., and Bro, R., 2003, Tracing dissolved organic matter in aquatic environments using a new approach to fluorescence spectroscopy: Marine Chemistry, v. 82, p. 239–254.
- Stonik, V.A., and Elyakov, G.B., 1988, Secondary metabolites from echinoderms as chemotaxonomic markers: Bioorganic Marine Chemistry, v. 2, p. 43–86.
- Summons, R.E., and Walter, M.R., 1990, Molecular fossils and microfossils of prokaryotes and protists from Proterozoic sediments: American Journal of Science, v. 290-A, p. 212–244.
- Sumrall, C.D., and Waters, J.A., 2012, Universal elemental homology in glyptocystitoids, hemicosmitoids, coronoids, and blastoids: Steps toward echinoderm phylogenetic reconstruction in derived blastozoans: Journal of Paleontology, v. 86, p. 956–972, doi:10.11666/12-029R.1.
- Sumrall, C.D., and Wray, G.A., 2007, Ontogeny in the fossil record: Diversification of body plans and the evolution of “aberrant” symmetry in Paleozoic echinoderms: Paleobiology, v. 33, p. 149-163.

- Takahasi, D., Maoka, T., Tushima, M., Fujitani, K., Kozuka, M., Matuno, T., and Shingu, T., 2002, New quinone sulfates from the crinoids *Tropiometra afra macrodiscus* and *Oxycomanthus japonicas*: Chemical and Pharmaceutical Bulletin, v. 50, p. 1609–1612.
- Taylor, D.W., Li, H., Dahl, J., Fago, F.J., Zinniker, D. Moldowan, J.M., 2006, Biogeochemical evidence for the presence of the angiosperm molecular fossil oleanane in Paleozoic and Mesozoic non-angiosperm fossils: Paleobiology, v. 32, p. 179-190.
- Thomas, D.W. and Blumer, M., 1964, The organic chemistry of a fossil – III: The hydrocarbons and their geochemistry. Geochimica et Cosmochemica Acta v. 28, p. 1467-1477.
- Tissot, B., Deroo, G., and Hood, A., 1978, Geochemical study of the Unita Basin: Formation of petroleum from the Green River Formation: Geochimica et Cosmochemica Acta, v. 42, p. 1469–1485.
- Villier, L., and Eble, G.J., 2004, Assessing the robustness of disparity estimates: the impact of morphometric scheme, temporal scale, and taxonomic level in spatangoid echinoids: Paleobiology, v. 30, p. 652-665.
- Wolkenstein, K. 2005. Phenanthroperylenechinon-Pigmente in fossilen Crinoiden: Charakterisierung, Vorkommen und Diagenese. Doctoral Dissertation, Ruprecht-Karls-Universität. Heidelberg, Germany, 113 p.
- Wolkenstein, K., 2014, Comment: Isolation and characterization of the earliest taxon-specific organic molecules (Mississippian, Crinoidea): Geology, v. 42, p. e320-321. doi: 10.1130/G34583C.1.
- Wolkenstein, K., Gross, J.H., Heinz, F., and Schöler, H.F., 2006, Preservation of hypericin and related polycyclic quinone pigments in fossil crinoids: Proceedings of the Royal Society B, v. 273, p. 451–456.

- Wolkenstein, K., Głuchowski, E., Gross, J.H., and Marynowski, L., 2008, Hypericrinoid pigments in millericrinids from the lower Kimmeridgian of the Holy Cross Mountains (Poland): *PALAIOS*, v. 23, p. 773–777.
- Zamora, S., Rahman, I.A., and Smith, A.B., 2012, Plated Cambrian bilaterians reveal the earliest stages of echinoderm evolution: *PLoS ONE*, v. 7, p. e38296.
